# Supplementary material
Source: publisher site journal article supplement (https://www.dovepress.com/article/579212)

Supplementary Table 1. Baseline characteristics of study participants, including non-COPD

|  | Non-COPD  (N=8762) | Old COPD  > 50 years  (N=638) | Young COPD  ≤ 50 years  (N=177) | *p-*value |
| --- | --- | --- | --- | --- |
| Age (years) | 51.1 ± 8.7 | 61.9 ± 5.1 | 46.0 ± 3.1 | < 0.001 |
| Sex |  |  |  | < 0.001 |
| Male | 3978 (45.4%) | 501 (78.5%) | 118 (66.7%) |  |
| Female | 4784 (54.6%) | 137 (21.5%) | 59 (33.3%) |  |
| BMI (Kg/m2) | 24.7 ± 3.1 | 23.2 ± 3.0 | 24.0 ± 2.8 | < 0.001 |
| Residence area |  |  |  | < 0.001 |
| Rural (Ansung) | 4144 (47.3%) | 494 (77.4%) | 111 (62.7%) |  |
| Urban (Ansan) | 4618 (52.7%) | 144 (22.6%) | 66 (37.3%) |  |
| Education |  |  |  | < 0.001 |
| Elementary school or below | 2783 (32.0%) | 331 (52.8%) | 21 (12%) |  |
| Middle school or high school | 4699 (54.0%) | 264 (42.1%) | 139 (79.4%) |  |
| College or higher | 1224 (14.1%) | 32 (5.1%) | 15 (8.6%) |  |
| Household income |  |  |  | < 0.001 |
| Low | 5447 (63.2%) | 543 (86.7%) | 104 (59.1%) |  |
| Middle | 2491 (28.9%) | 66 (10.5%) | 56 (31.8%) |  |
| High | 674 (7.8%) | 17 (2.7%) | 16 (9.1%) |  |
| Smoking status |  |  |  | < 0.001 |
| Never | 5293 (61.1%) | 162 (25.6%) | 66 (37.7%) |  |
| Ex | 1308 (15.1%) | 142 (22.5%) | 33 (18.9%) |  |
| Current | 2058 (23.8%) | 328 (51.9%) | 76 (43.4%) |  |
| Smoking pack-years | 22.1 ± 16.6 | 32.3 ± 20.1 | 25.3 ± 16.7 | < 0.001 |
| Biomass exposure |  |  |  |  |
| Chemical | 206 (2.4%) | 10 (1.6%) | 7 (4.2%) | 0.133 |
| Dust | 607 (7.2%) | 53 (8.8%) | 19 (11.5%) | 0.045 |
| Comorbid condition |  |  |  |  |
| HTN | 1366 (31.1%) | 138 (48.1%) | 8 (14.3%) | < 0.001 |
| DM | 582 (14.0%) | 59 (23%) | 10 (17.2%) | < 0.001 |
| Ischemic heart disease | 74 (1.8%) | 14 (5.7%) | 4 (7.3%) | < 0.001 |
| Congestive heart failure | 21 (0.5%) | 1 (0.4%) | 1 (1.9%) | 0.395 |
| Dyslipidemia | 221 (5.4%) | 8 (3.3%) | 5 (9.1%) | 0.159 |
| CKD | 266 (6.4%) | 10 (4%) | 2 (3.7%) | 0.236 |
| CVA | 88 (2.2%) | 20 (7.9%) | 1 (1.9%) | < 0.001 |
| Arthritis | 403 (22.9%) | 186 (86.1%) | 22 (75.9%) | 0.010 |
| Thyroid disease | 309 (10.7%) | 10 (3.9%) | 1 (2.4%) | 0.001 |
| Dyspnea | 1428 (16.5%) | 171 (27.1%) | 28 (15.9%) | < 0.001 |
| mMRC | 1.7 ± 1.5 | 1.6 ± 1.5 | 1.2 ± 1.3 | 0.267 |
| Chronic bronchitis | 111 (1.3%) | 32 (5.3%) | 8 (4.6%) | <0.001 |
| Lung function |  |  |  |  |
| FVC (L) | 3.6 ± 0.9 | 3.8 ± 0.8 | 4.2 ± 0.9 | < 0.001 |
| FVC, % predicted | 104.7 ± 14.4 | 107.1 ± 17.5 | 105.7 ± 14.8 | < 0.001 |
| FEV1 (L) | 2.9 ± 0.7 | 2.4 ± 0.6 | 2.7 ± 0.6 | < 0.001 |
| FEV1, % predicted | 113.9 ± 16.4 | 93.9 ± 17.4 | 88.9 ± 14.5 | < 0.001 |
| FEV1/FVC, % | 81.6 ± 5.6 | 62.9 ± 6.3 | 64.2 ± 5.5 | < 0.001 |
| FEF25-75% (L) | 3.2 ± 1.0 | 1.3 ± 0.5 | 1.7 ± 0.5 | < 0.001 |
| FEF25-27% , % predicted | 108.3 ± 30.1 | 48.3 ± 15.7 | 51.0 ± 14.5 | < 0.001 |

Data are presented as number (%) or mean ± inter-quartile range

Abbreviation: BMI, body mass index; CKD, chronic kidney disease; CVA, cerebral vascular disease; DM, diabetes mellitus; FEV1, forced expiratory volume in 1 second; FVC, forced vital capacity; FEF25-75%, forced expiratory flow at 25-75% of forced vital capacity; mMRC, modified Medical Research Council

Supplementary Table 2. Distribution of COPD prevalence based on fixed ratio and LLN criteria

|  | COPD by LLN | Normal by LLN | Total | Cohen’s Kappa |
| --- | --- | --- | --- | --- |
| Young age (N= 4858) |  |  |  | 0.673 |
| COPD by fixed ratio | 176 (3.6%) | 1 (0.02%) | 177 (3.6%) | (p<0.001) |
| Normal by fixed ratio | 158 (3.3%) | 4523 (93.1%) | 4681 (96.4%) |  |
| Total | 334 (6.9%) | 4524 (93.1%) |  |  |
| Old age ( N=4719) |  |  |  | 0.782 |
| COPD by fixed ratio | 451 (9.6%) | 187 (3.96%) | 638 (13.5%) | (p<0.001) |
| Normal by fixed ratio | 28 (0.6%) | 4053 (85.9%) | 4081 (86.5%) |  |
| Total | 479 (10.2%) | 4240 (89.8%) |  |  |

Abbreviation: LLN, lower limit of normal

Supplementary Table 3. Number of participants undergoing lung function tests

|  | Old COPD | Young COPD |
| --- | --- | --- |
| Baseline (2001 – 2002) | 638 | 177 |
| 1st (2003 – 2004) | 268 | 79 |
| 2nd (2005 – 2006) | 424 | 123 |
| 3rd (2007 – 2008) | 313 | 104 |
| 4th (2009 – 2010) | 281 | 106 |
| 5th (2011 – 2012) | 165 | 58 |
| 6th (2013 – 2013) | 204 | 102 |

Supplementary Table 4. Characteristics of COPD patients stratified by severity and age group

|  | Mild COPD | | | Moderate-to-severe COPD | | |
| --- | --- | --- | --- | --- | --- | --- |
|  | Old COPD  > 50 years  (N=522) | Young COPD  ≤ 50 years  (N=133) | *p*-value | Old COPD  > 50 years  (N=116) | Young COPD  ≤ 50 years  (N=44) | *p-*value |
| mMRC | 1.4 ± 1.5 | 1.2 ± 1.4 | 0.591 | 2.1 ± 1.6 | 1.1 ± 1.2 | 0.112 |
| Lung function |  |  |  |  |  |  |
| FVC (L) | 3.9 ± 0.8 | 4.4 ± 0.8 | < 0.001 | 3.2 ± 0.6 | 3.7 ± 0.8 | < 0.001 |
| FVC, % predicted | 111.3 ± 15.5 | 110.9 ± 12.1 | 0.738 | 88.4 ± 13.4 | 90.1 ± 10.7 | 0.454 |
| FEV1 (L) | 2.5 ± 0.5 | 2.9 ± 0.6 | < 0.001 | 1.8 ± 0.4 | 2.2 ± 0.5 | < 0.001 |
| FEV1, % predicted | 99.5 ± 13.3 | 95.0 ± 10.2 | < 0.001 | 68.6 ± 9.4 | 70.5 ± 8.8 | 0.263 |
| FEV1/FVC, % | 64.2 ± 4.8 | 65.5 ± 3.6 | < 0.001 | 56.6 ± 8.0 | 60.0 ± 7.7 | 0.015 |
| FEF25-75% (L) | 1.4 ± 0.4 | 1.8 ± 0.5 | < 0.001 | 0.9 ± 0.4 | 1.3 ± 0.4 | < 0.001 |
| FEF25-27% , % predicted | 52.0 ± 13.8 | 55.2 ± 13.1 | 0.016 | 31.3 ± 12.0 | 38.1 ± 10.5 | 0.001 |

Mild COPD corresponds to GOLD 1, while moderate-to-severe COPD includes GOLD 2–4.

Abbreviation: FEV1, forced expiratory volume in 1 second; FVC, forced vital capacity; FEF25-75%, forced expiratory flow at 25-75% of forced vital capacity; mMRC, modified Medical Research Council

Supplementary Figure 1. Comparison of lung function changes from baseline to the end of follow-up between young and old COPD patients. (A) FEV1; (B) FVC; (C) FEF25–75%; (D) FEV1/FVC ratio. Box plots show median and interquartile range with whiskers indicating range and dots indicating outliers. P-values indicate between-group comparisons.
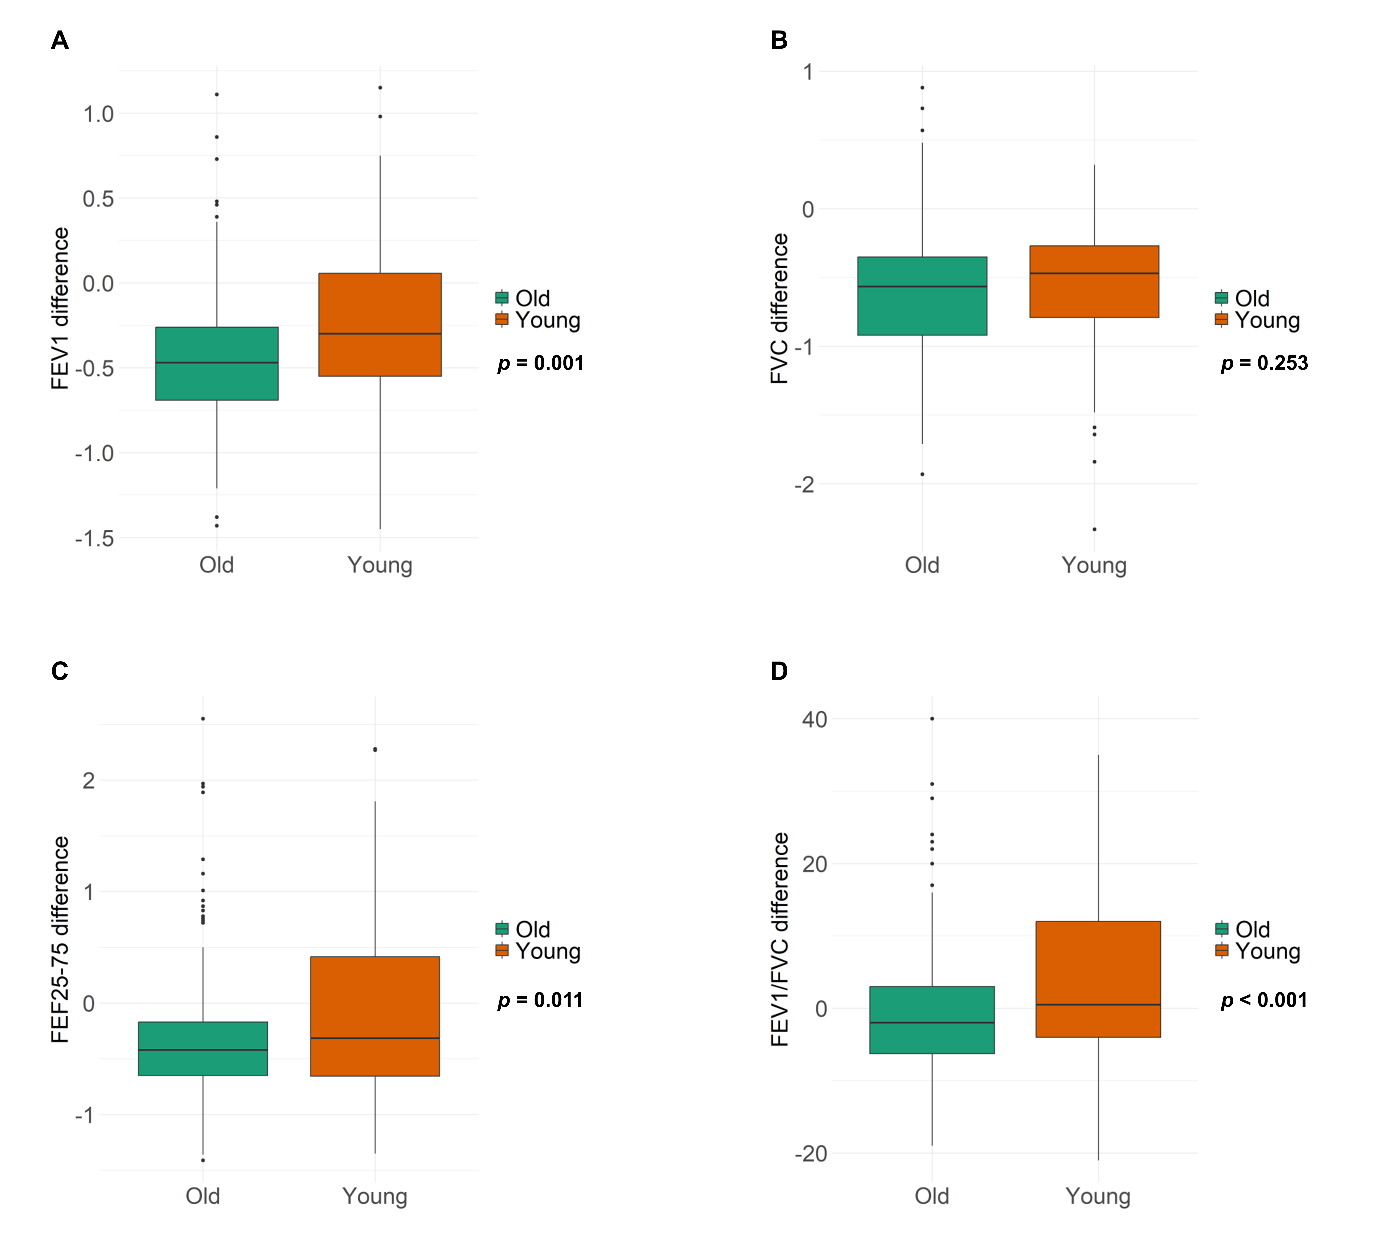


Supplementary Figure 2. Lung function trajectory over time. (A) FEV1; (B) FVC; (C) FEF25–75%; (D) FEV1/FVC ratio. Significant differences compared to normal spirometry (p < 0.05) are indicated by *


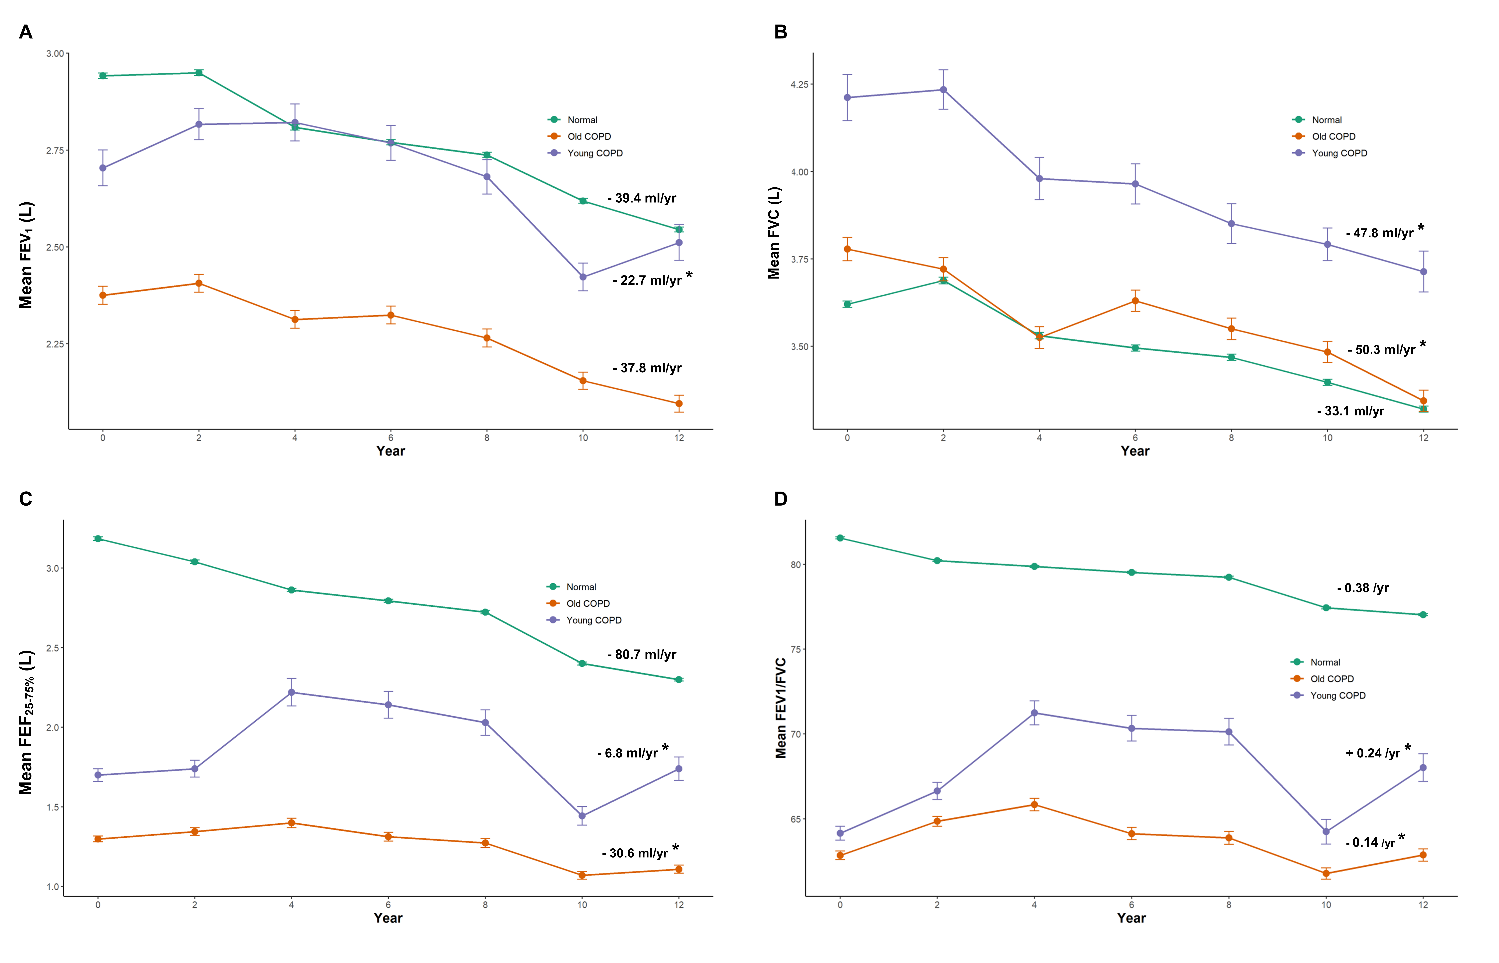


Supplementary Figure 3. Lung function trajectories in mild and moderate-to-severe COPD. (A) FEV1 in mild COPD; (B) FEV1 in moderate-to-severe COPD; (C) FVC in mild COPD; (D) FVC in moderate-to-severe COPD; (E) FEF25–75% in mild COPD; (F) FEF25–75% in moderate-to-severe COPD; (G) FEV1/FVC ratio in mild COPD; (H) FEV1/FVC ratio in moderate-to-severe COPD (young vs. old COPD).


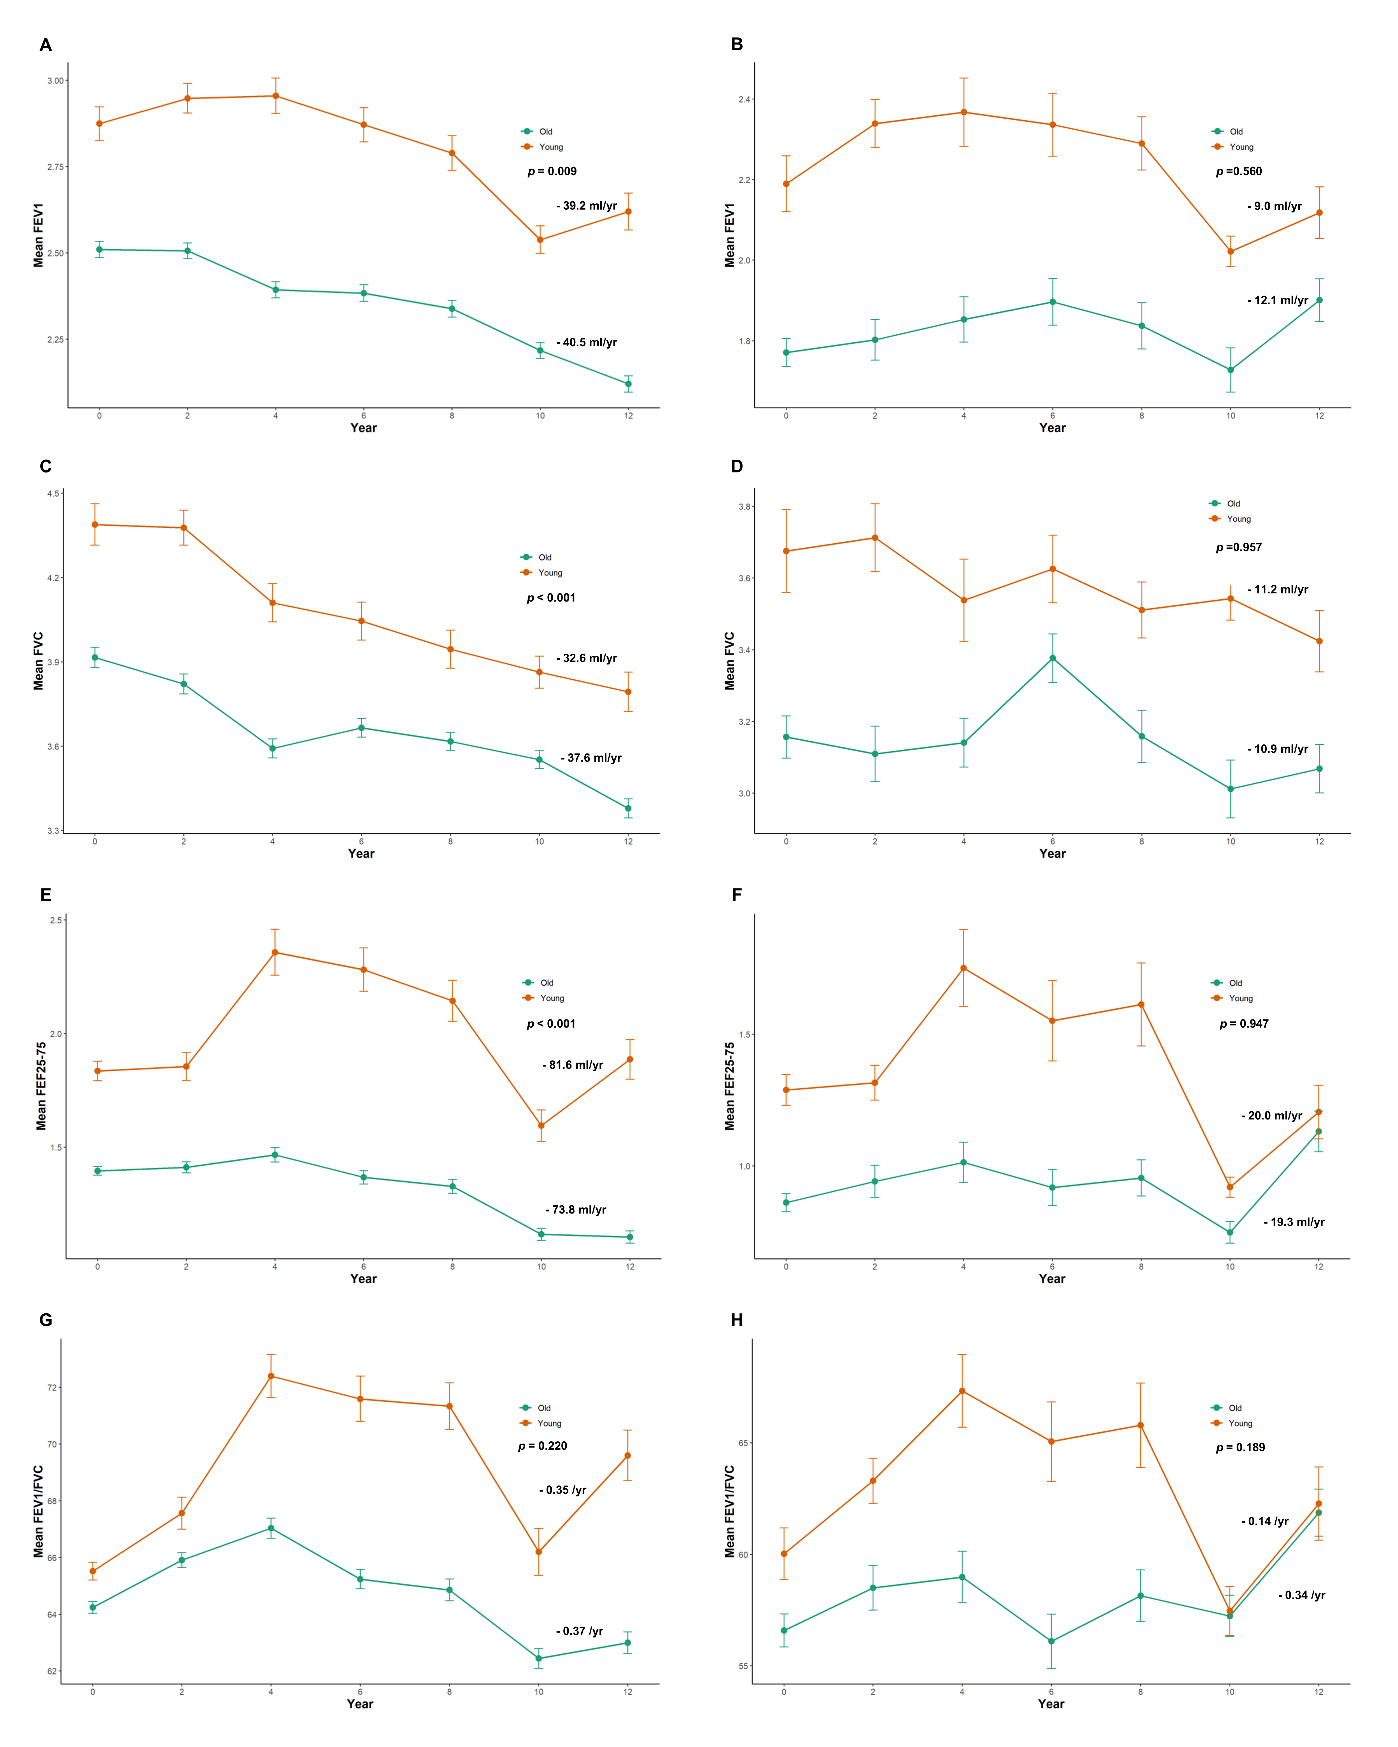

Supplement: Supplementary file 1 [file Supplementary_material_1.docx]
